# Supplementary material for: The Effect of Chitosan/Alginate/Graphene Oxide Nanocomposites on Proliferation of Mouse Spermatogonial Stem Cells
Source: MDPI journal article supplement (doi:10.3390/jfb14120556), 2023-11-22
Supplement: s1 [file s1]

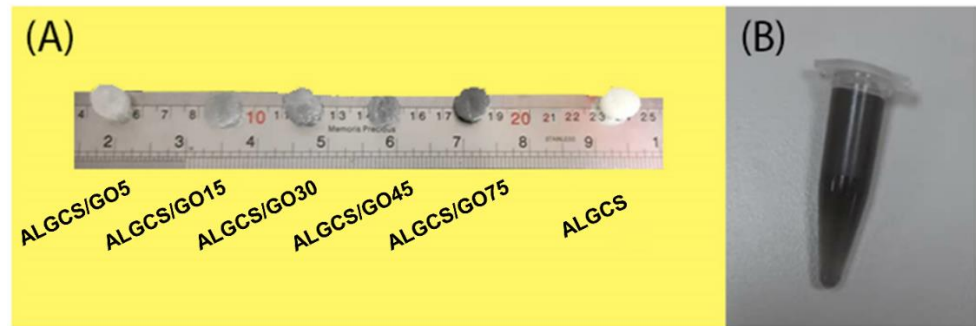

**Figure S1.** (A) Appearance of alginate and chitosan scaffolds synthesized with different percentages of graphene oxide (5, 15, 30, 45, 75  $\mu\text{g/mL}$ ), (B) Graphene oxide solution 1 mg/mL, which was used in the preparation of scaffolds.

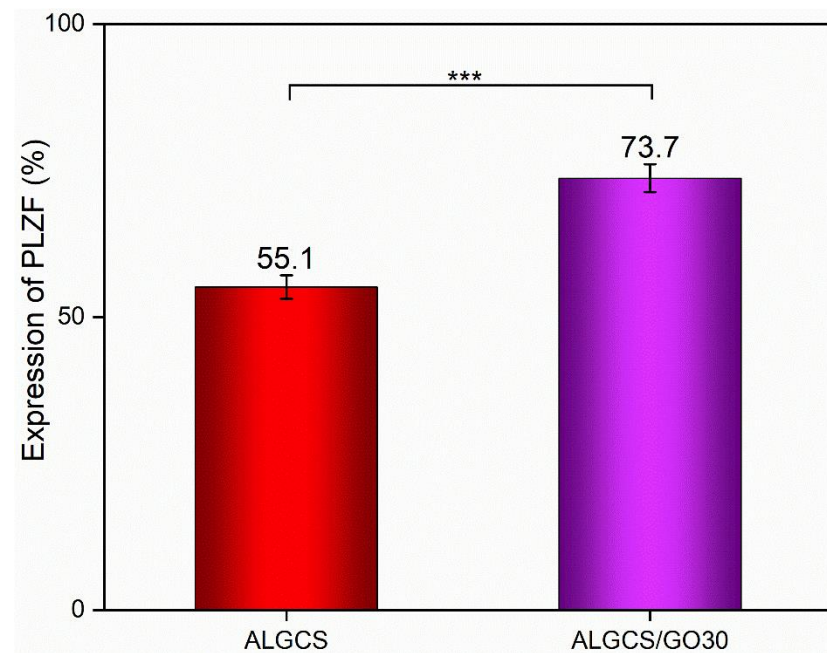

**Figure S2.** The expression of PLZF on ALGCS, ALGCS/GO30, a significant difference between ALGCS/GO30 and ALGCS (\*\* $p < 0.001$ ).

**Table S1.** Degradation of the scaffolds.

| Samples    | Degradation day 3 | Degradation day 7 | Degradation day 14 |
|------------|-------------------|-------------------|--------------------|
| ALGCS      | $4.01 \pm 0.82$   | $16.50 \pm 0.41$  | $32.12 \pm 0.82$   |
| ALGCS/GO30 | $2.17 \pm 0.24$   | $14.33 \pm 0.47$  | $28.60 \pm 0.29$   |
